# Supplementary material
Source: PubMed Central journal article supplement (PMC1088378)

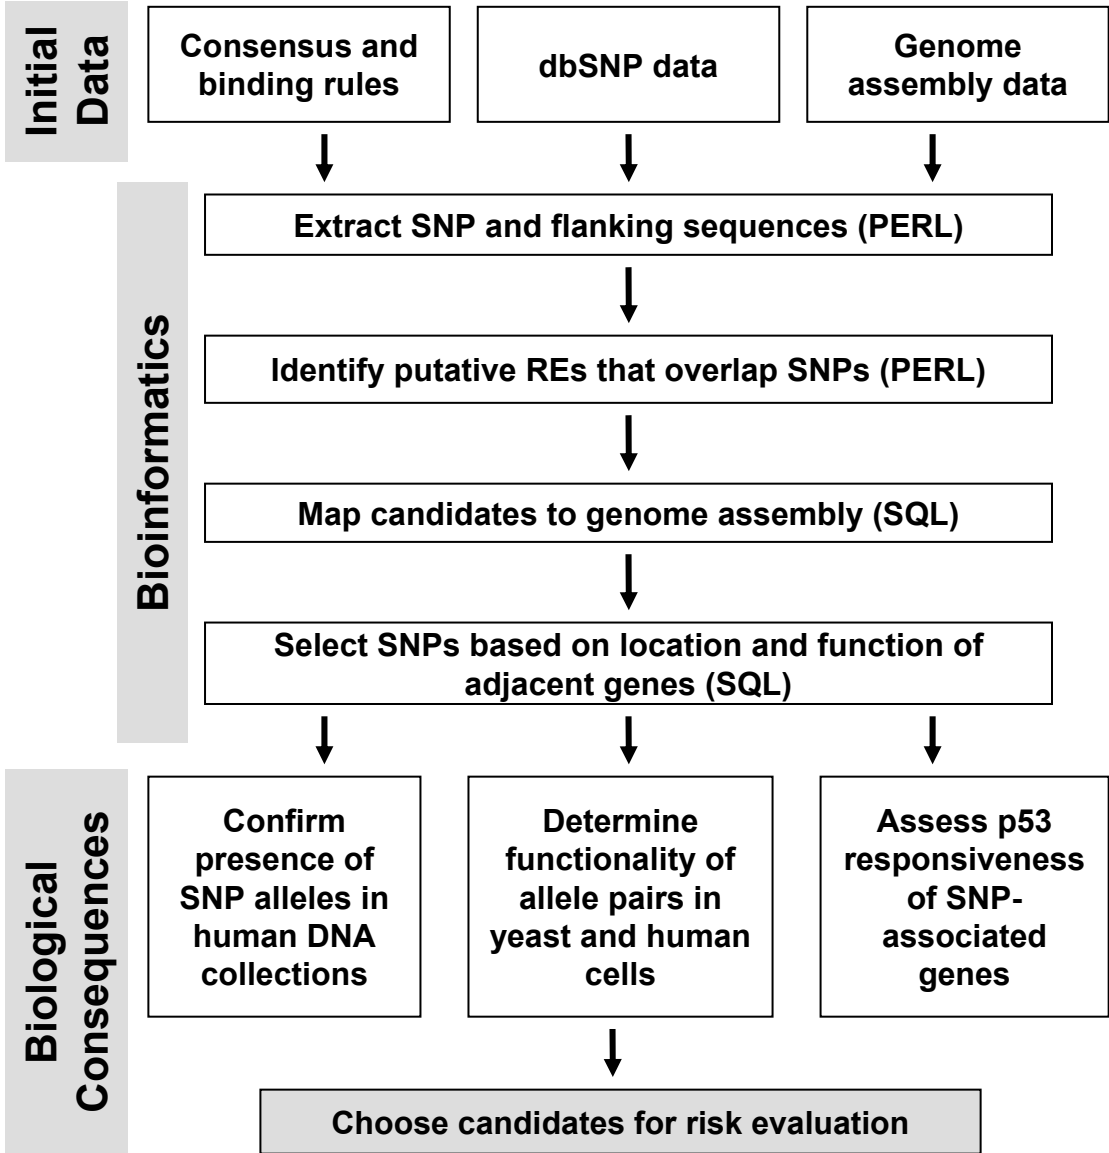

Supplement: pnas_102_18_6431__1.pdf [file pnas_102_18_6431__1.pdf]

Relative Induction

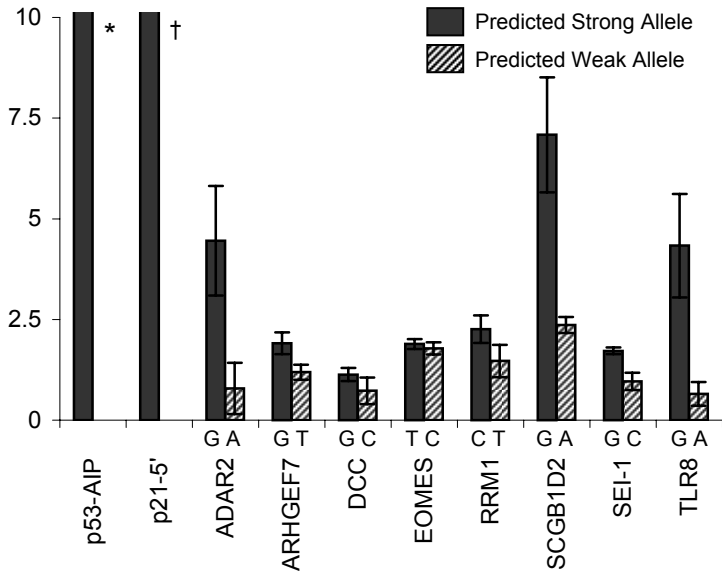

Supplement: pnas_102_18_6431__2.pdf [file pnas_102_18_6431__2.pdf]
